# Supplementary material for: Photocatalytic decomposition behavior and reaction pathways of organic compounds using Cu nanoparticles synthesized via a green route
Source: Royal Society of Chemistry journal article supplement (doi:10.1039/c6pp00116e), 2016-08-15
Supplement: c6pp00116e1.pdf [file c6pp00116e1.pdf]

## SUPPLEMENTARY INFORMATION:

**Fig. A1** UV-Visible absorption spectra of the egg shell extract and the synthesized Cu NPs

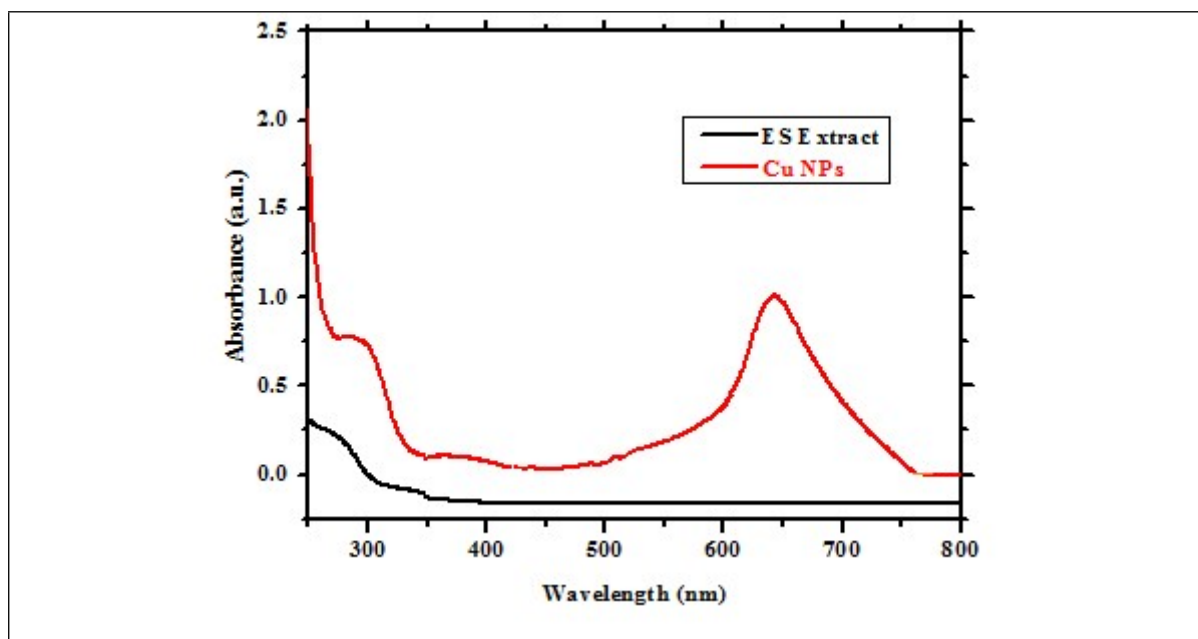

**Fig. A1** UV-Visible absorption spectra of the egg shell extract and the synthesized Cu NPs.

The intermediates generated during the degradation process were analysed using LC-MS technique and were identified by comparison with commercial standards and by interpretation of their fragment ions in the mass spectra.

Fig. A2 (a) displayed the LC-MS of RB dye solution with Cu NPs initially. The figure depicted a prominent mass signal at  $m/z = 1022$  which was very close to the formula mass of RB dye. Noticeably, no mass signals corresponding to the formula of reaction intermediates were found. Fig. A2 (b) showed the LC-MS of RB dye solution with Cu NPs after 165 minutes.

Here, it was observed that the signal at  $m/z = 1022$  was weakened and multiple signals corresponding to the reaction intermediates were found.

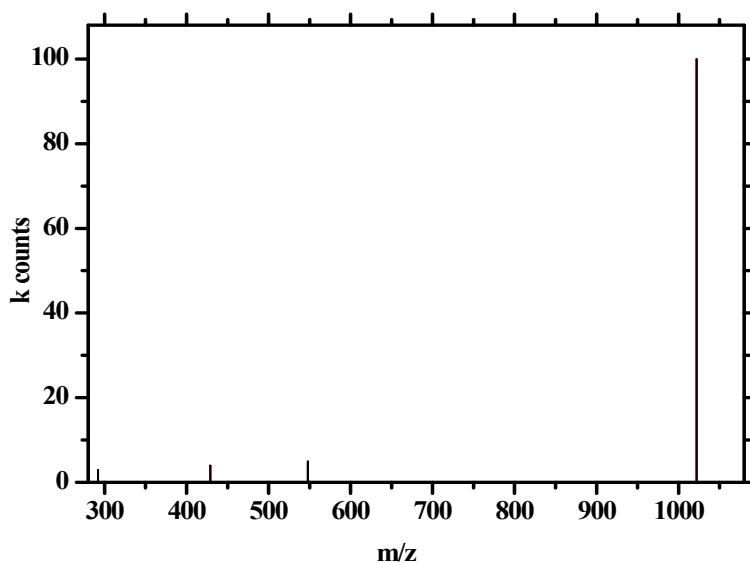

**Fig. A2 (a)** represented the LC-MS of RB dye solution with Cu NPs after 0 min.

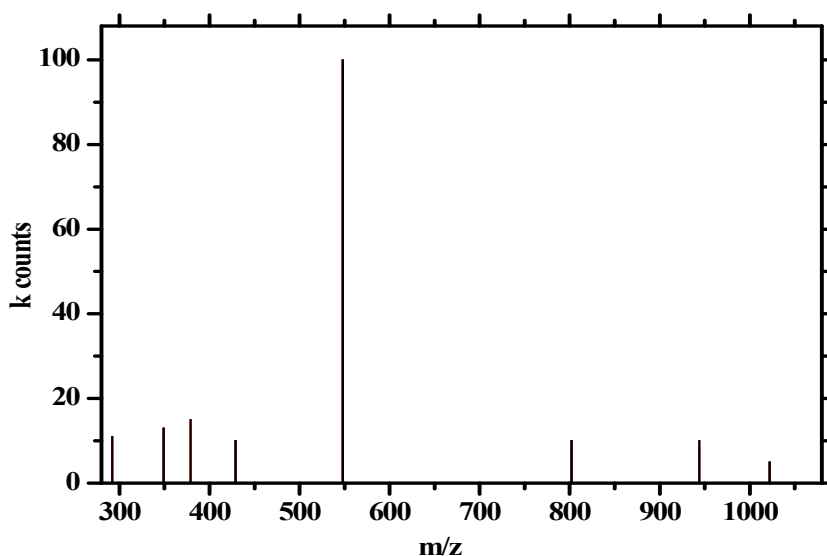

**Fig. A2 (b)** represented the LC-MS of RB dye solution with Cu NPs after 165 min.

Fig. A3 (a) depicted the LC-MS of MB dye solution with Cu NPs initially. The figure clearly displayed a prominent peak at  $m/z = 319.9$  which was very close to the formula mass of MB dye. Noticeably, no signals corresponding to the formation of reaction intermediates were observed. Fig. A3 (b) represented the LC-MS of MB dye solution with Cu NPs after 135 minutes. Here, it was found that the signal at  $m/z = 319.9$  is

weakened and multiple mass signals corresponding to reaction intermediates have appeared.

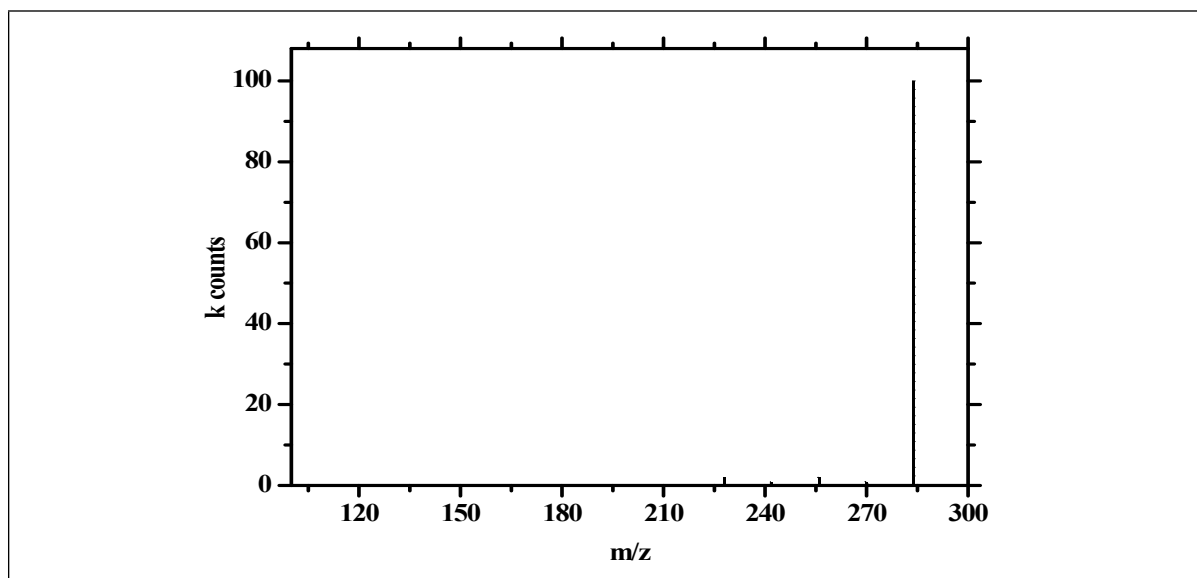

**Fig. A3 (a)** showed the LC-MS of MB dye solution with Cu NPs after 0 min.

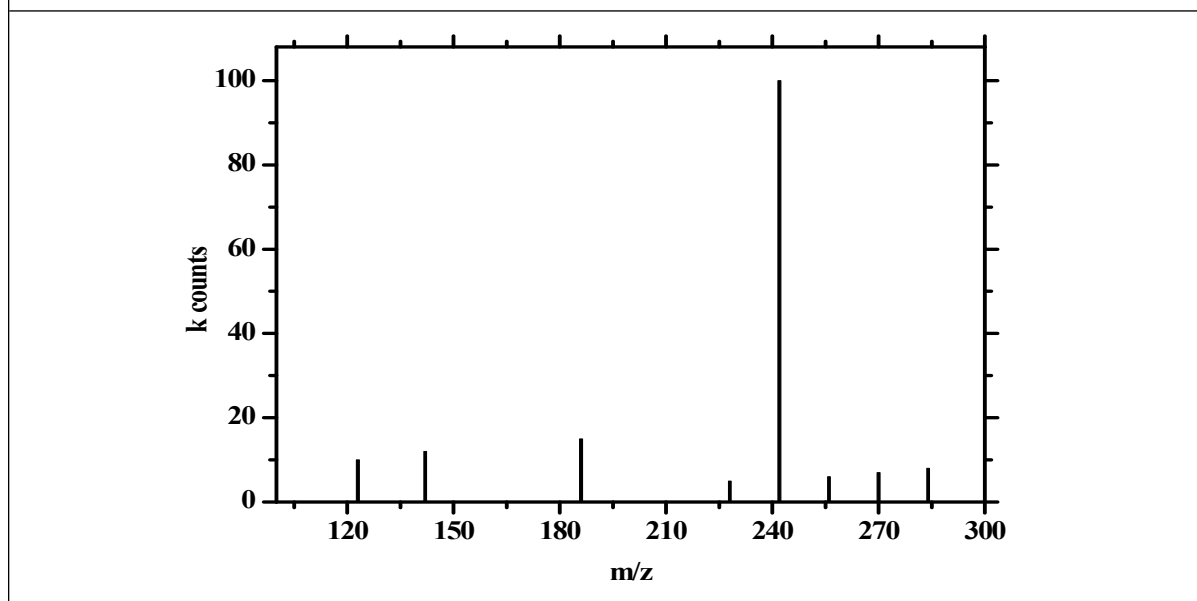

**Fig. A3 (b)** showed the LC-MS of MB dye solution with Cu NPs after 135 min.

Fig. A4 (a) depicted the LC-MS of MV6B dye solution with Cu NPs initially. The figure clearly displayed a prominent peak at  $m/z = 344$  which was very close to the formula mass of MV6B dye. Noticeably, no signals corresponding to the formation of reaction intermediates were observed. Fig. A4 (b) represented the LC-MS of MV6B dye solution

with Cu NPs after 150 minutes. Here, it was found that the multiple mass signals corresponding to reaction intermediates have appeared.

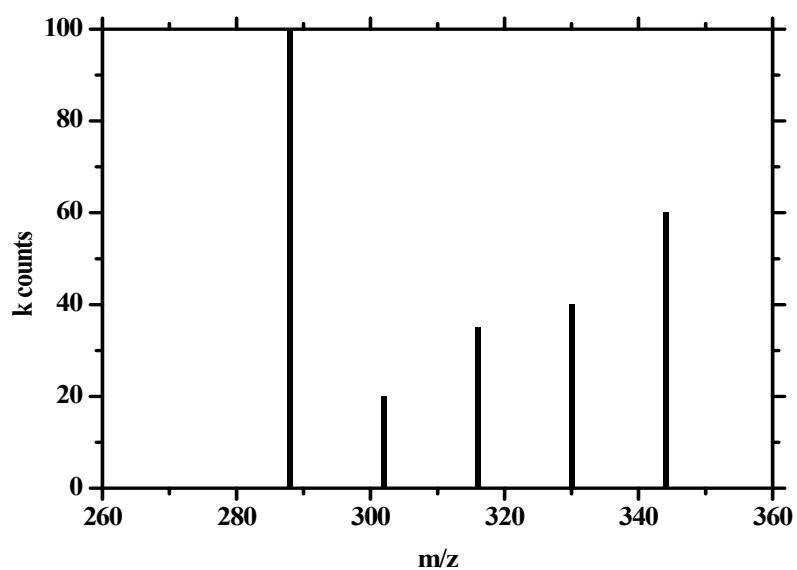

**Fig. A4 (a)** showed the LC-MS of MV6B dye solution with Cu NPs after 0 min.

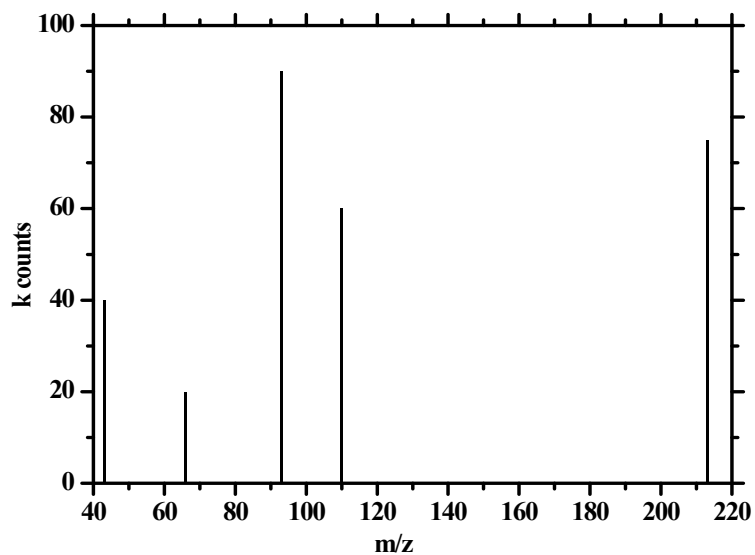

**Fig. A4 (b)** depicted the LC-MS of MV6B dye solution with Cu NPs after 150 min.
